# Supplementary material
Source: ML conference proceedings conference paper supplement (https://proceedings.neurips.cc/paper_files/paper/2022/hash/94e85561a342de88b559b72c9b29f638-Abstract.html)

## A Appendix</

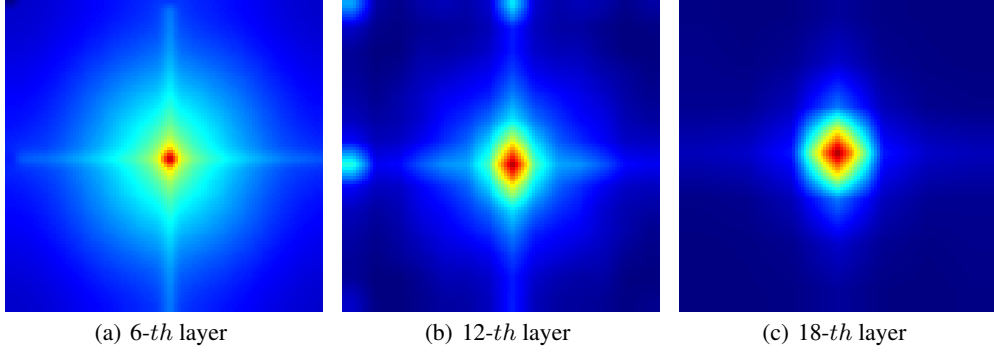

Supplement: Supplementary file 1 [file 94e85561a342de88b559b72c9b29f638-Supplemental-Conference.pdf]
